# Supplementary material for: RBFOX2 regulated EYA3 isoforms partner with SIX4 or ZBTB1 to control transcription during myogenesis
Source: PubMed Central journal article supplement — iScience. 2023 Oct 20;26(11):108258. doi: 10.1016/j.isci.2023.108258 (PMC10665822; doi:10.1016/j.isci.2023.108258), 2023-10-20
Supplement: mmc1.pdf [file mmc1.pdf]

iScience, Volume 26

## **Supplemental information**

### **RBFOX2 regulated EYA3 isoforms partner with SIX4 or ZBTB1 to control transcription during myogenesis**

**Hannah J. Wiedner, R. Eric Blue, Matheus Sadovsky, C. Allie Mills, Xander H.T. Wehrens, Laura E. Herring, and Jimena Giudice**

## SUPPLEMENTAL INFORMATION

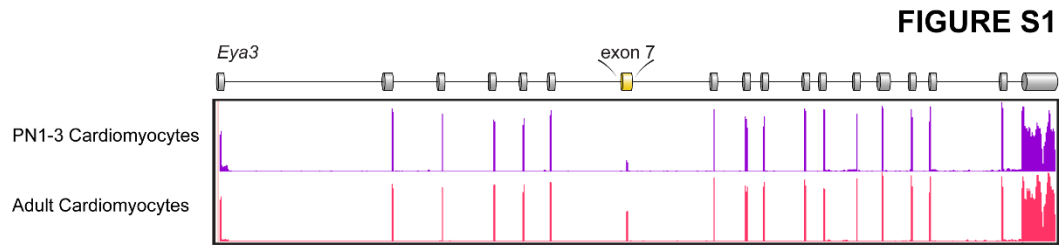

**Figure S1. *Eya3* splicing patterns are developmentally regulated in cardiomyocytes isolated from neonatal and adult mouse hearts, related to Figure 1.** RNA-seq tracks (reference [S1]) from mouse cardiomyocytes freshly isolated from postnatal day 1-3 (PN1-3, purple) and adult heart (pink) tissues at the eyes absent homolog 3 (*Eya3*) locus, visualized in the UCSC genome browser. The alternative exon (exon 7) is shown in yellow.

**FIGURE S2**

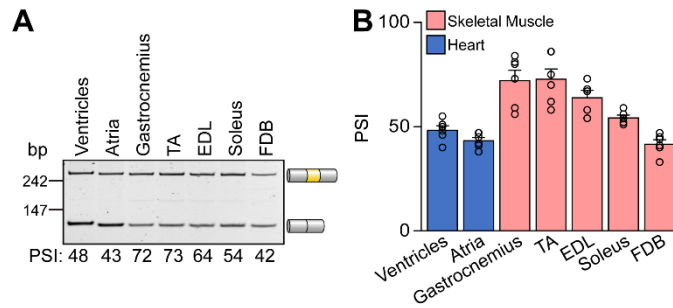

**Figure S2. Inclusion levels of Eya3 exon 7 in a panel of adult mouse cardiac and skeletal muscle tissues reveal that Eya3 splicing is striated muscle specific, related to Figure 1. (A, B)** Splicing of Eya3 exon 7 was evaluated by RT-PCR in adult (1-4-month-old) ventricles, atria, and the gastrocnemius, tibialis anterior (TA), extensor digitorum longus (EDL), soleus, and flexor digitorum brevis (FDB) muscles (A) and quantified by densitometry ( $n=5-6$ ) (B). Cardiac tissues are labeled in blue and skeletal muscle tissues are shown in pink. bp, base pairs. PSI, percent spliced in. Results are shown as mean  $\pm$  SEM.

**FIGURE S3**

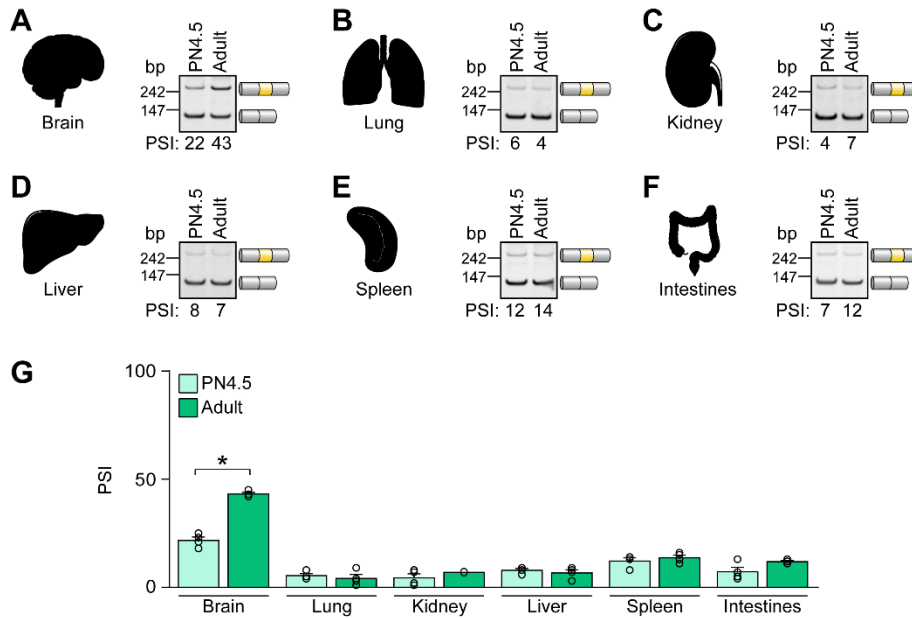

**Figure S3. Inclusion levels of Eya3 exon 7 in a panel of neonatal and adult mouse tissues indicate that this exon is developmentally regulated in the brain, but not in other non-striated muscle tissues, related to Figure 1. (A-G)** Splicing of Eya3 exon 7 was evaluated by RT-PCR in neonatal (postnatal day 4.5, PN4.5) and adult (3-4-month-old) mouse brain (A), lung (B), kidney (C), liver (D), spleen (E), intestines (F) and quantified by densitometry ( $n=4$ ) (G). bp, base pairs. PSI, percent spliced in. Results are shown as mean  $\pm$  SEM.  $*p < 0.05$ , Student's T test.

## FIGURE S4

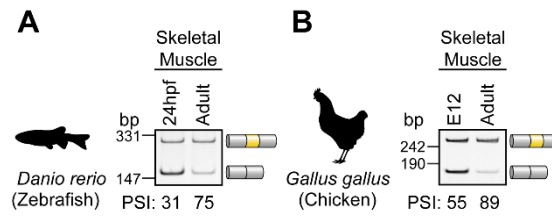

**Figure S4. Inclusion levels of Eya3 exon 7 during zebrafish and chicken development reaffirms the evolutionary conservation of exon 7 splicing, related to Figure 1. (A, B)** The inclusion of Eya3 exon 7 was determined by RT-PCR in skeletal muscle tissues of zebrafish (A) and chicken (B) at indicated developmental timepoints. bp, base pairs. E, embryonic day. hpf, hours post fertilization. PSI, percent spliced in.

## FIGURE S5

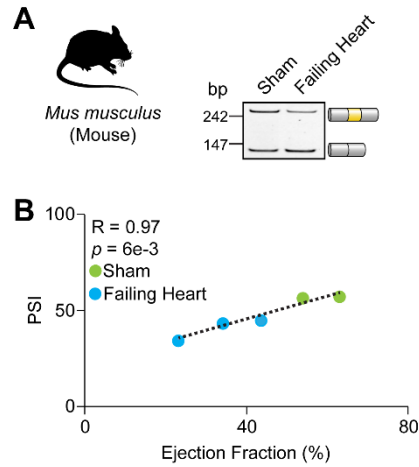

**Figure S5. Inclusion levels of Eya3 exon 7 are reduced in response to heart failure induced by transverse aortic constriction (TAC), related to Figure 1. (A, B)** Splicing of Eya3 exon 7 in ventricles was evaluated by RT-PCR after mice were subjected to transverse aortic constriction (failing hearts) or sham surgeries (A). Scatterplot displaying the correlation between ejection fraction and Eya3 exon 7 inclusion (B). bp, base pairs. PSI, percent spliced in. A significance test for correlation was performed in panel B.

## FIGURE S6

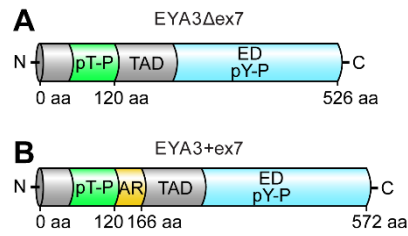

**Figure S6. At the protein level, the inclusion of EYA3 exon 7 produces an in-frame insertion within the transactivation domain, related to Figure 2. (A, B)** Schematic of protein domains found within the EYA3 isoform lacking exon 7 (EYA3 $\Delta$ ex7) (**A**) and the EYA3 isoform including exon 7 (EYA3+ex7) (**B**). aa, amino acid. AR, alternative region. ED, EYA domain. pT-P, threonine phosphatase domain. pY-P, tyrosine phosphatase domain. TAD, transactivation domain.

**FIGURE S7**

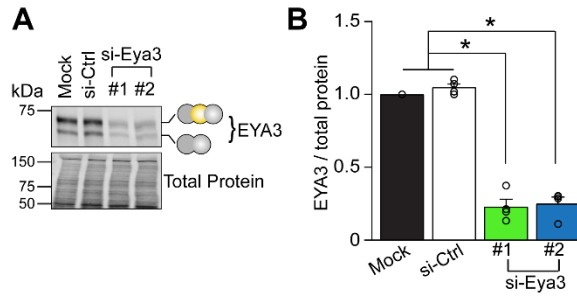

**Figure S7. EYA3 knockdown efficiency is maintained following myoblast differentiation, related to Figure 2.** C2C12 myoblasts were transfected with control (si-Ctrl) or two Eya3 si-RNAs (si-Eya3 #1, si-Eya3 #2) then differentiated into myotubes for four or five days. EYA3 knockdown efficiency was confirmed in myotubes by western blot analysis (A) and quantified by densitometry (B). Results are shown as mean  $\pm$  SEM. \* $p < 0.05$  (versus si-Ctrl and mock), Student's T test,  $n=3-4$ .



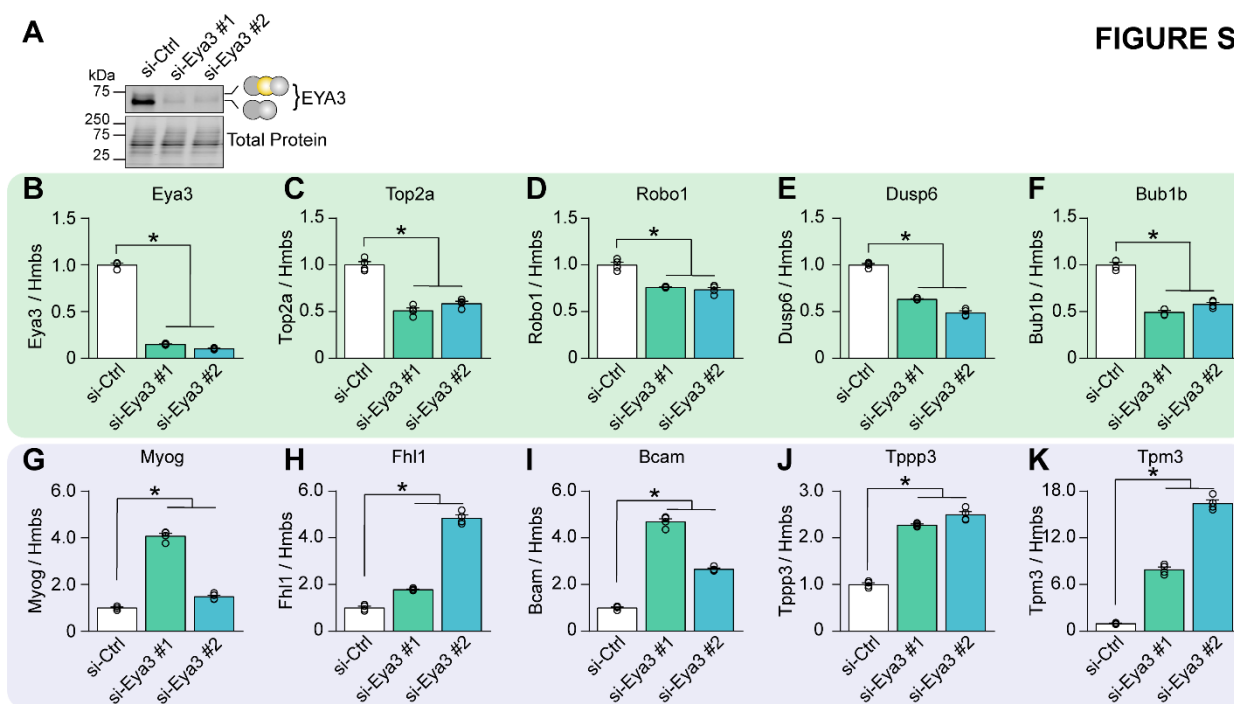

**Figure S8. Depletion of Eya3 in undifferentiated C2C12 myoblasts confirms direct targets of EYA3 coregulation, related to Figure 5.** C2C12 myoblasts were transfected with control (si-Ctrl) or two Eya3 si-RNAs (si-Eya3 #1, si-Eya3 #2) and analyzed 48 h after si-RNA delivery. **(A)** EYA3 knockdown efficiency was evaluated by western blotting. **(B-K)** Real time quantitative PCR (qPCR) analysis following Eya3 depletion ( $n=4$ ): Eya3 **(B)**, Top2a, DNA topoisomerase II alpha **(C)**, Robo1, roundabout guidance receptor 1 **(D)**, Dusp6, dual specificity phosphatase 6 **(E)**, Bub1b, BUB1 mitotic checkpoint serine/threonine kinase B **(F)**, Myog, myogenin **(G)**, Fhl1, four and a half LIM domains 1 **(H)**, Bcam, basal cell adhesion molecule **(I)**, Tppp3, tubulin polymerization promoting protein family member 3 **(J)**, and Tpm3, tropomyosin 3 **(K)**. Hmbs, hydroxymethylbilane synthase. Results are shown as mean  $\pm$  SEM. \* $p < 0.05$  (versus si-Ctrl), Student's T test.

**FIGURE S9**

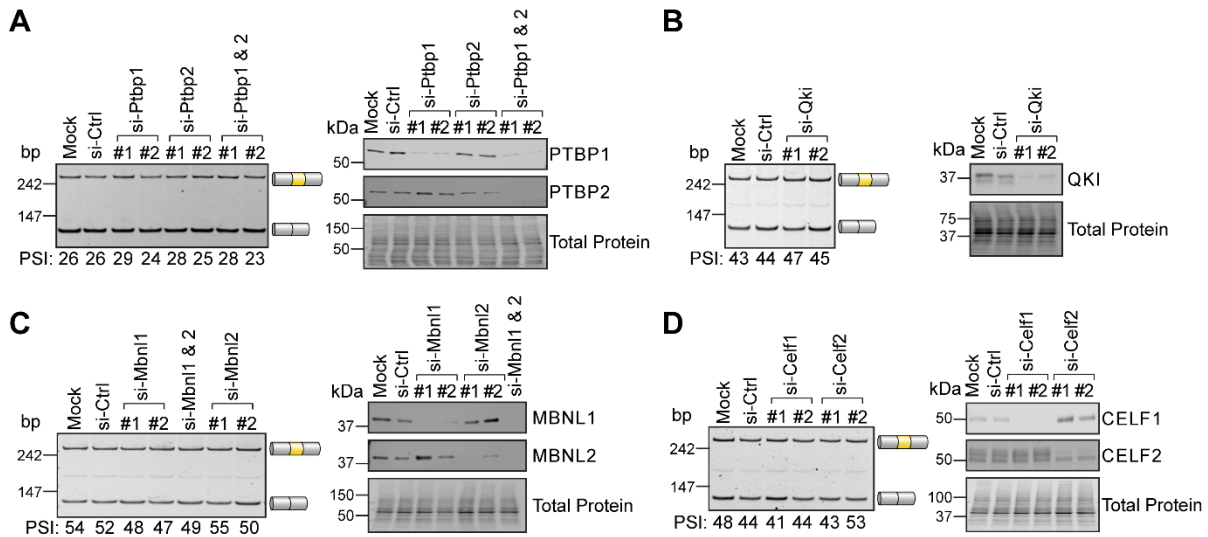

**Figure S9. PTBP1, PTBP2, QKI, MBNL1, MBNL2, CELF1, and CELF2 do not regulate splicing of Eya3 exon 7, related to Figure 7. (A-D)** Splicing of Eya3 exon 7 was evaluated by RT-PCR upon knockdown of PTBP1 and/or PTBP2 (**A, left**), QKI (**B, left**), MBNL1 and/or MBNL2 (**C, left**), and CELF1 and/or CELF2 (**D, left**). Protein levels of PTBP1 and PTBP2 (**A, right**), QKI (**B, right**), MBNL1 and MBNL2 (**C, right**), and CELF1 and CELF2 (**D, right**) were determined via western blotting. bp, base pairs. CELF1, CUGBP Elav-like family member 1. CELF2, CUGBP Elav-like family member 2. MBNL1, muscleblind like splicing regulator 1. MBNL2, muscleblind like splicing regulator 2. PTBP1, polypyrimidine tract binding protein 1. PTBP2, polypyrimidine tract binding protein 2. QKI, KH domain containing RNA binding. PSI, percent spliced in.

| Gene symbol | Organism         | Genome          | Size of the alternative region (nt) | Genomic coordinates of the alternative region | Forward primer       | Reverse primer       | Expected sizes (nt) |
|-------------|------------------|-----------------|-------------------------------------|-----------------------------------------------|----------------------|----------------------|---------------------|
| <i>Eya3</i> | <i>Mouse</i>     | <i>mm10</i>     | 138                                 | chr4:132680756-132680893                      | TCCTGGGCAGACTCAGTACC | GGTATCAGGCTGGCATTGT  | 258, 120            |
| <i>EYA3</i> | <i>Human</i>     | <i>hg38</i>     | 138                                 | chr1:28027789-28027926                        | GCAGACTCAACCCTATGCTG | TATCAGGCTGGCATTGTGC  | 226, 88             |
| <i>EYA3</i> | <i>Rabbit</i>    | <i>oryCun2</i>  | 138                                 | chr13:137482356-137482493                     | GGCAGACTCAGTACCAGACA | TGGTTTGAGATGCTGGCAAC | 310, 172            |
| <i>Eya3</i> | <i>Rat</i>       | <i>rn6</i>      | 138                                 | chr5:150872712-150872849                      | CACACATCCTCTCGGTTCT  | GTGGATATCAGGCTGGCATT | 298, 160            |
| <i>eya3</i> | <i>Zebrafish</i> | <i>danRer11</i> | 159                                 | chr19:24900244-24900402                       | ATGCCAGTCAAGTGGCTTTC | CTGTGGTCACTGCGGTTG   | 315, 156            |
| <i>EYA3</i> | <i>Chicken</i>   | <i>galGal6</i>  | 138                                 | chr23:1601275-1601412                         | AATGAGCCCTTACCCTGGTC | ACTGGACTGGCATTGGTAGT | 267, 129            |

**Table S1, related to Figure 1 and STAR methods.** Sequences of the primers (Thermo Fisher Scientific or Sigma) used to analyze *Eya3* splicing by RT-PCR assays.

| Sample number | Tissue type | Tissue details                                                 | Diagnosis | Cause of death                 | Age     | Sex     |
|---------------|-------------|----------------------------------------------------------------|-----------|--------------------------------|---------|---------|
| 1             | Muscle      | skeletal muscle with focal increased interstitial inflammation | Myositis  | Unknown                        | 36      | Male    |
| 2             | Heart       | left ventricle apex                                            | DM1       | Pneumonia, Respiratory failure | 47      | Male    |
| 3             | Heart       | left ventricle free wall near apex                             | DM1       | Respiratory failure            | 50      | Female  |
| 4             | Heart       | whole without valves                                           | DM1       | Anoxia                         | 52      | Male    |
| 5             | Heart       | left ventricle apex                                            | DM1       | Unknown                        | Unknown | Unknown |

**Table S2, related to Figure 1 and STAR methods.** Myositis and myotonic dystrophy type 1 (DM1) patient clinical information.

| <b>Gene</b>   | <b>Probe ID</b> | <b>Organism</b> | <b>Exon boundary</b> | <b>Amplicon length (nt)</b> |
|---------------|-----------------|-----------------|----------------------|-----------------------------|
| <i>Bcam</i>   | Mm00522338_m1   | mouse           | 8 – 9                | 94                          |
| <i>Crym</i>   | Mm00516679_m1   | mouse           | 7 – 8                | 70                          |
| <i>Fhl1</i>   | Mm04204611_g1   | mouse           | 4 – 5                | 114                         |
| <i>Tppp3</i>  | Mm01251070_g1   | mouse           | 3 – 4                | 65                          |
| <i>Tpm3</i>   | Mm00445589_m1   | mouse           | 1 – 2                | 65                          |
| <i>Igfbp2</i> | Mm00492632_m1   | mouse           | 1 – 2                | 85                          |
| <i>Top2a</i>  | Mm01296339_m1   | mouse           | 15 – 13              | 75                          |
| <i>Myo1b</i>  | Mm01257265_m1   | mouse           | 27 – 28              | 65                          |
| <i>Myog</i>   | Mm00446194_m1   | mouse           | 1 – 2                | 69                          |
| <i>Parm1</i>  | Mm00523913_m1   | mouse           | 2 – 3                | 69                          |
| <i>Robo1</i>  | Mm00803879_m1   | mouse           | 28 – 29              | 106                         |
| <i>Bub1b</i>  | Mm00437811_m1   | mouse           | 5 – 6                | 79                          |
| <i>Ptn</i>    | Mm01132688_m1   | mouse           | 3 – 4                | 61                          |
| <i>Dusp6</i>  | Mm00518185_m1   | mouse           | 2 – 3                | 82                          |
| <i>Eya3</i>   | Mm00438810_m1   | mouse           | 8 – 9                | 103                         |

**Table S3, related to Figures 3 and 5, and STAR methods.** qPCR TaqMan® probes (Applied Biosystems).

| <b>Gene symbol</b> | <b>Transcripts per million (TPM)</b> |
|--------------------|--------------------------------------|
| <i>Six2</i>        | 0                                    |
| <i>Six4</i>        | 18                                   |
| <i>Six5</i>        | 2                                    |

**Table S4, related to Figure 3.** Transcripts per million (TPM) for SIX family gene members from RNA-seq analysis of si-Ctrl myotube sample 1.

| Gene symbol      | Catalog No.      | Target sequence           |
|------------------|------------------|---------------------------|
| <i>Ptbp1</i>     | MSS276537        | GGUGUGGUCAAAGGCUUCAAGUUCU |
| <i>Ptbp1</i>     | MSS276539        | CCUCUGGAGACAGCCAGCCUUCACU |
| <i>Ptbp2</i>     | MSS225938        | GGUGGCAAUACAGUCCUGUUGGUUA |
| <i>Ptbp2</i>     | MSS225940        | GGGCACUGUGAAAGCAUUUAAGUUU |
| <i>Qki</i>       | MSS208338        | GAGCGGUUGAAGAAGUGAAGAAGUU |
| <i>Qki</i>       | MSS276677        | GAGCGGCUGCUGGACGAAGAAUUA  |
| <i>Mbnl1</i>     | MSS226392        | CCACAGCCAACCAGAUACCCAUAUU |
| <i>Mbnl1</i>     | MSS226393        | GCAUUUCUCCCACCAGGCUCAUAU  |
| <i>Mbnl2</i>     | MSS272396        | GAGAUUAAUGGGAGGAACAAUUUGA |
| <i>Mbnl2</i>     | MSS200587        | GCGUUGCAUGAGGGAGAAAUGCAAA |
| <i>Celf1</i>     | MSS203372        | GGACAGAUUGAAGAGUGCCGGAUUU |
| <i>Celf1</i>     | MSS203374        | CCAUGAACGGCUUUCAAAUUGGAU  |
| <i>Celf2</i>     | MSS274200        | CAGAGUAAAGGUUGUUGUUUCGUAA |
| <i>Celf2</i>     | MSS204012        | GCUGGAGCCACUGUCGGAUUGAAUA |
| <i>Eya3</i>      | D-065562-01      | GGACCCAACAGUAGUAAUU       |
| <i>Eya3</i>      | D-065562-02      | UGAGGGAAAUCUACGACAA       |
| <i>Six4</i>      | D-057996-01-0002 | GCAAGCAAUUGUACUGUGU       |
| <i>Zbtb1</i>     | D-057238-02-0002 | UAUCAGCGCUGUCAUUUGA       |
| <i>Rbfox2</i>    | D-051552-01-0002 | GCAAUUGGCUGGAAGUUAA       |
| <i>Rbfox2</i>    | D-051552-04-0002 | CGAGAAUAGUGCUGAUGCA       |
| luciferase       | 12935146         | GCACUCUGAUUGACAAAUACGAUUU |
| Non-targeting #1 | D-001210-01-20   | UAGCGACUAAACACAUCAA       |

**Table S5, related to STAR methods.** Sequences of si-RNAs (Invitrogen or Dharmacon) used for depletion experiments.

## REFERENCE

- [S1] Giudice, J., Xia, Z., Wang, E.T., Scavuzzo, M.A., Ward, A.J., Kalsotra, A., Wang, W., Wehrens, X. H.T.T., Burge, C.B., Li, W., et al. (2014). Alternative splicing regulates vesicular trafficking genes in cardiomyocytes during postnatal heart development. *Nature Communications* 5, 3603. 10.1038/ncomms4603.
